# Supplementary material for: Optical backbone-sidechain charge transfer transitions in proteins sensitive to secondary structure and modifications
Source: Royal Society of Chemistry journal article supplement (doi:10.1039/c7fd00203c), 2017-10-30

## Supporting Information

# Optical Backbone-Sidechain Charge Transfer Transitions in Proteins Sensitive to Secondary Structure and Modifications

*Imon Mandal<sup>†</sup>, Sanjoy Paul<sup>†</sup>, Ravindra Venkatramani<sup>†\*</sup>*

<sup>†</sup> Department of Chemical Sciences, Tata Institute of Fundamental Research, Homi Bhabha Road, Colaba, Mumbai 400 005, India.

\* Corresponding Author

---

**CONTENTS**

|                                                                                                                                                          | <b>Page Number</b> |
|----------------------------------------------------------------------------------------------------------------------------------------------------------|--------------------|
| 1. Inter-residue sidechain contact maps for MD and NMR solution structures of ubiquitin                                                                  | 2                  |
| 2. Variation of geometric and spectral parameters over the sampled MD conformations of Lys                                                               | 3                  |
| 3. Variation of geometric and spectral parameters over the sampled MD conformations of Arg                                                               | 4                  |
| 4. Variation of geometric and spectral parameters over the sampled MD conformations of Glu                                                               | 5                  |
| 5. Variation of geometric and spectral parameters over the sampled MD conformations of Asp                                                               | 6                  |
| 6. Control calculations: Capping scheme used for TDDFT calculations of monomer units                                                                     | 7                  |
| 7. Decomposition of Lowest Energy Transitions for Glu, Asp, pSer, pThr, and pTyr                                                                         | 8                  |
| 8. Decomposition of Lowest Energy Transitions for Lys, Arg, Hsp, and His                                                                                 | 9                  |
| 9. Correlation of excitation wavelength of PBS-CT transitions in charged amino acids with ground state energy gap and $1/D_{CT}$ for charged amino acids | 10                 |

**Figure S1: Inter-residue sidechain contact maps for MD and NMR solution structures of ubiquitin**

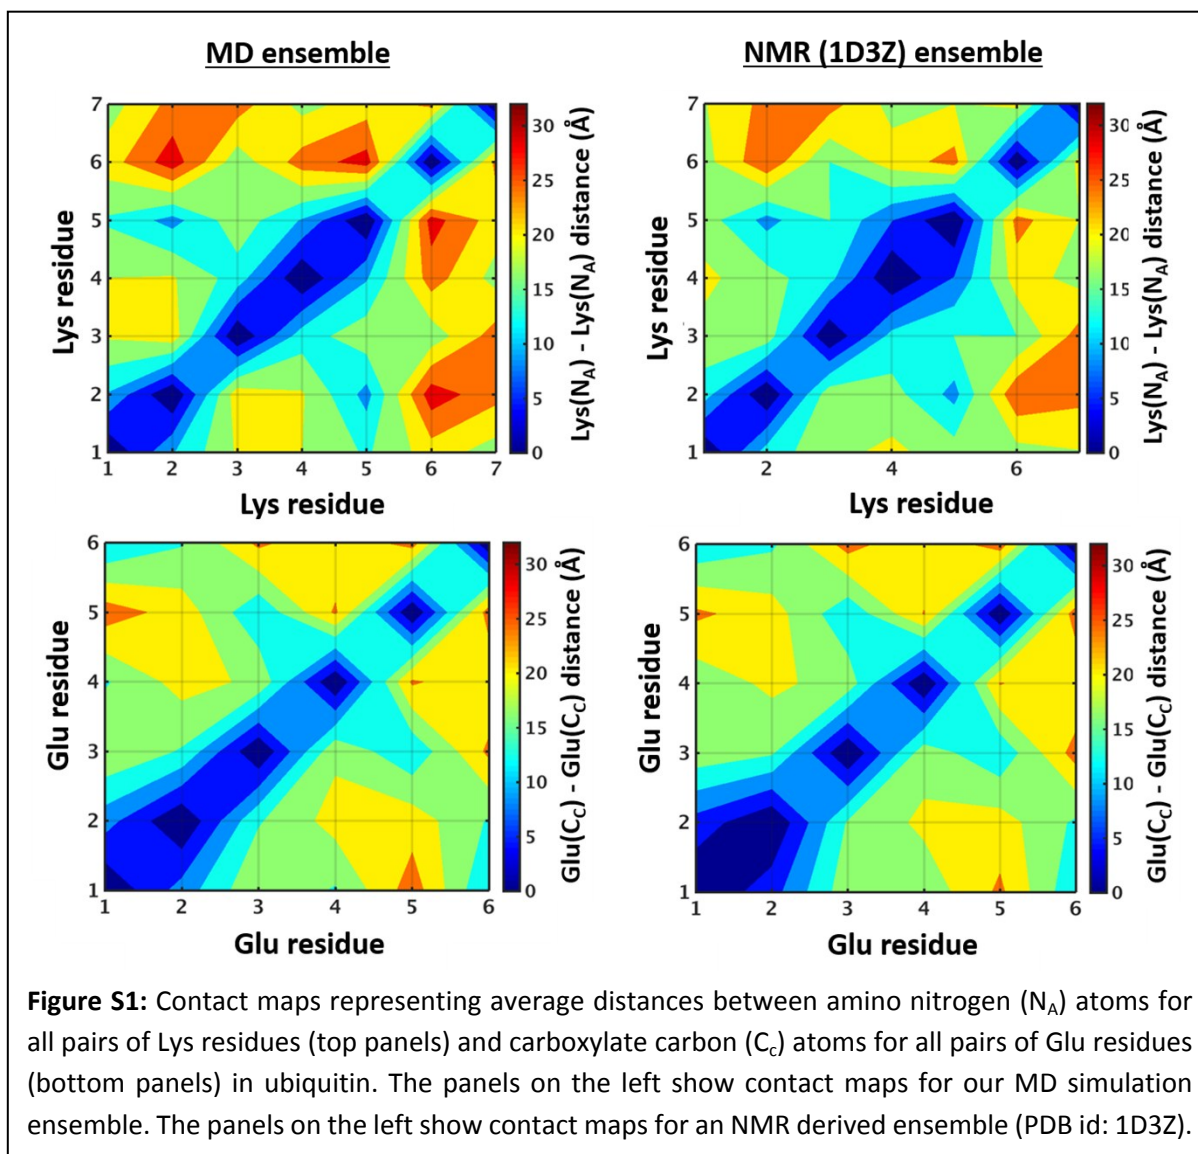

## Figure S2: Variation of geometric and spectral parameters over the sampled MD conformations of Lys

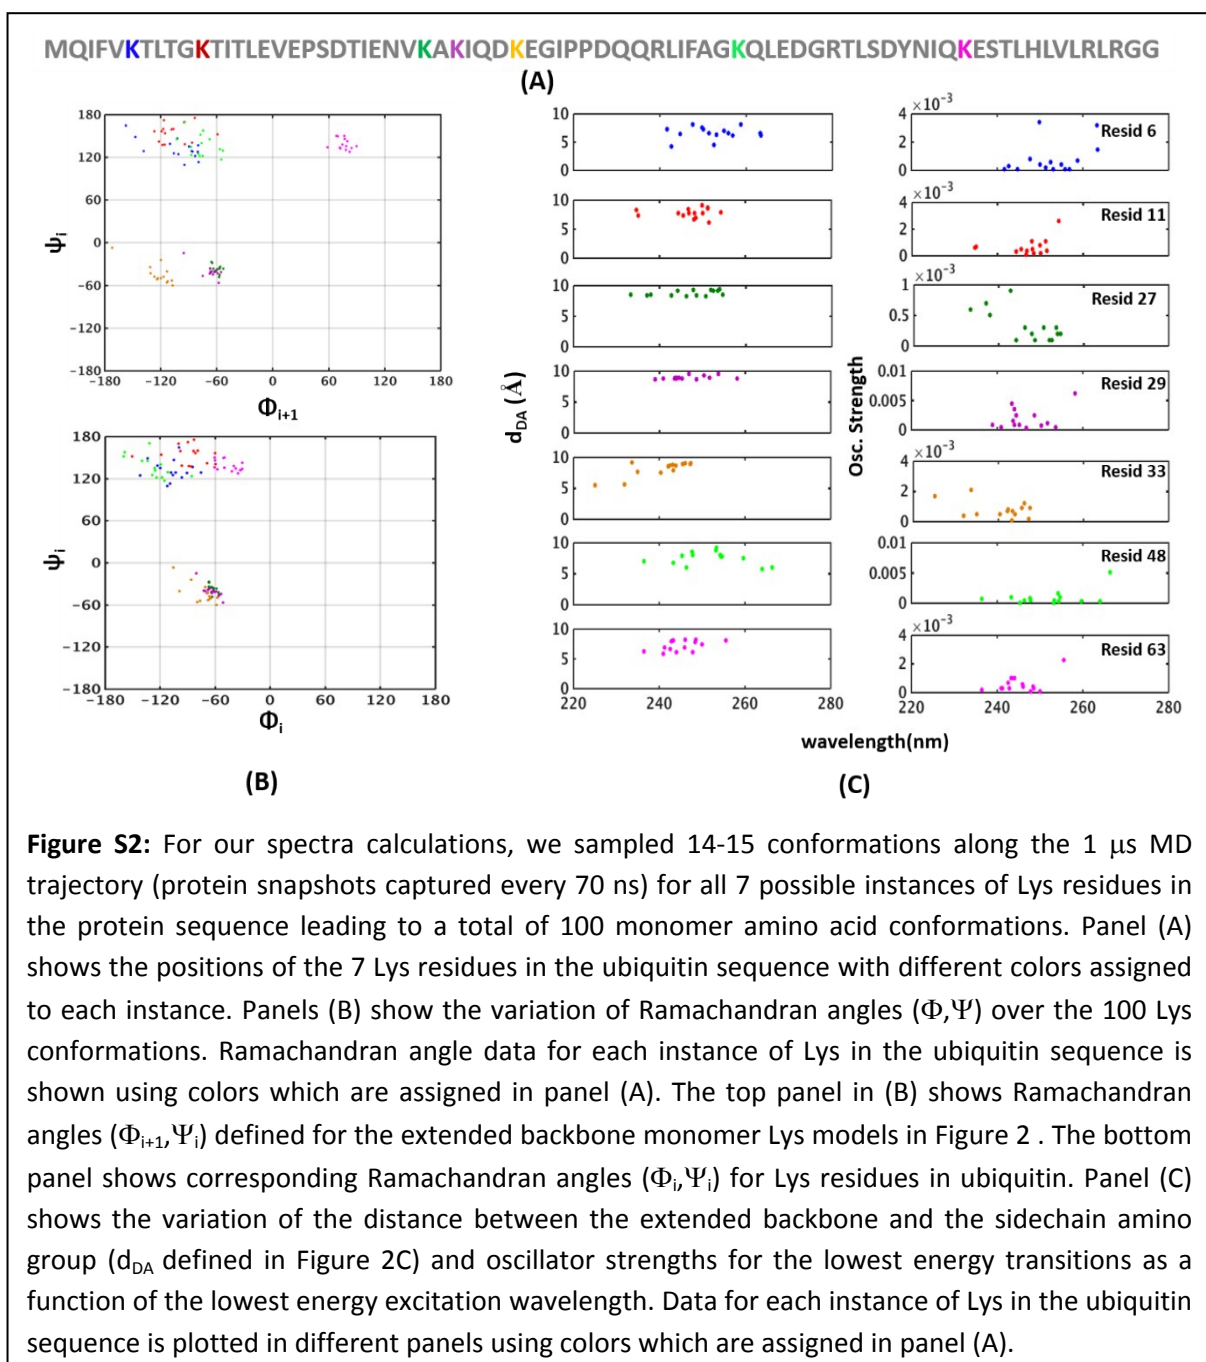

### Figure S3: Variation of geometric and spectral parameters over the sampled MD conformations of Arg

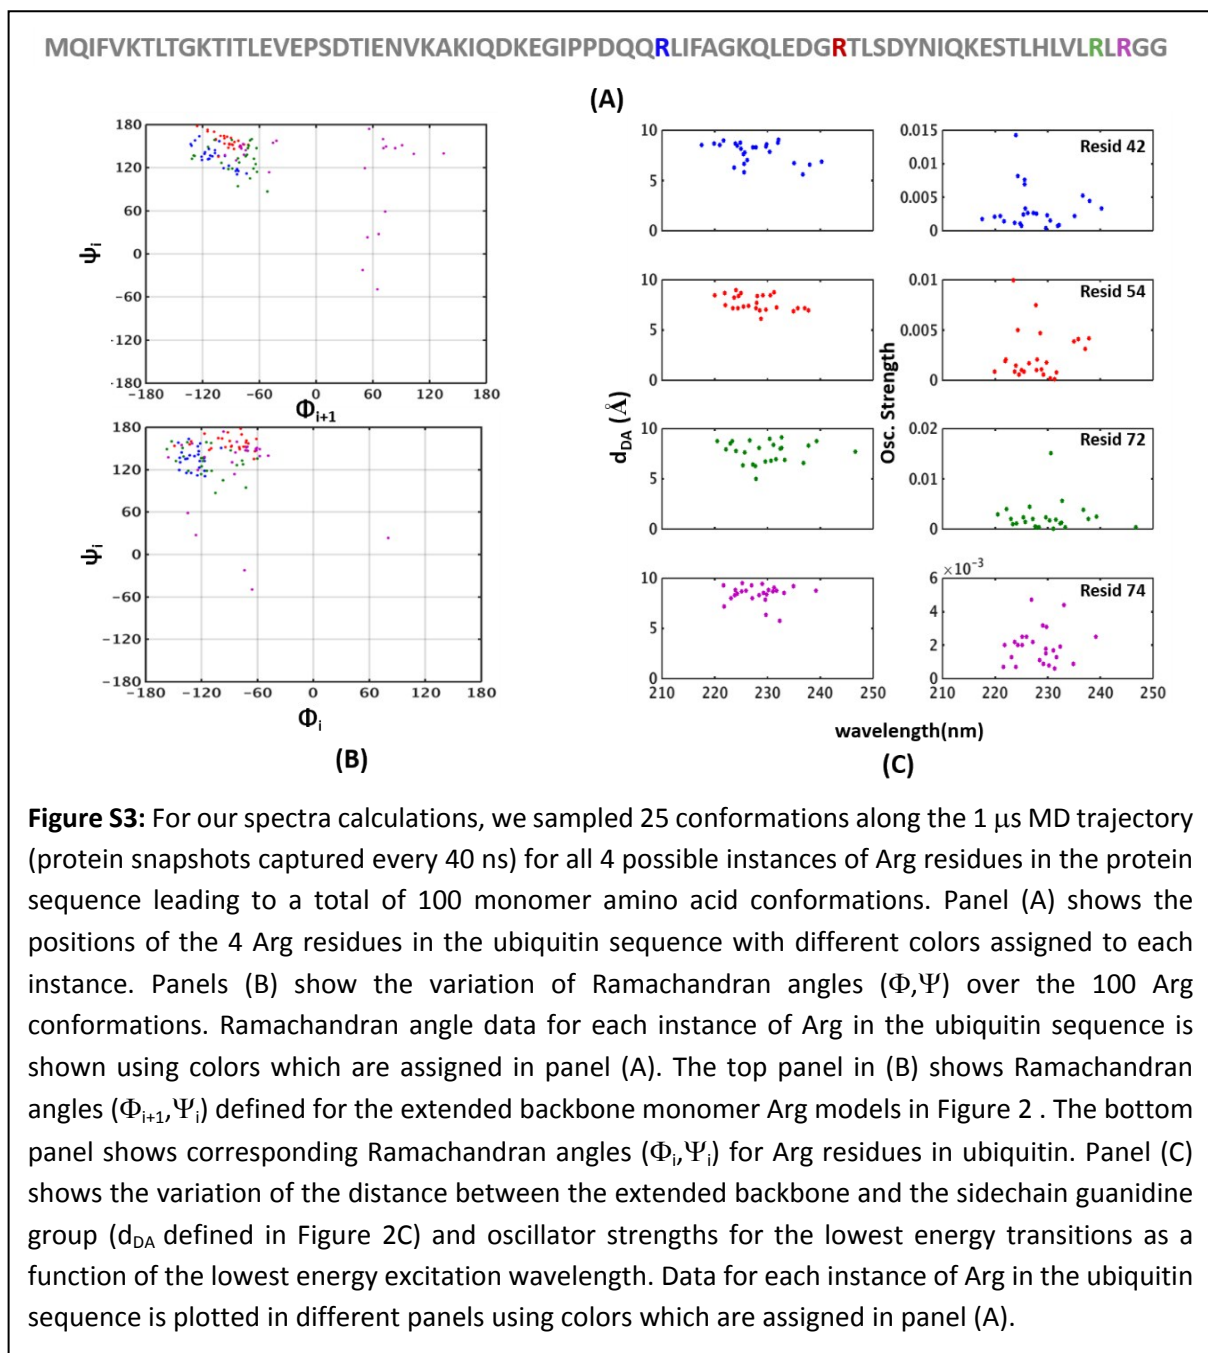

## Figure S4: Variation of geometric and spectral parameters over the sampled MD conformations of Glu

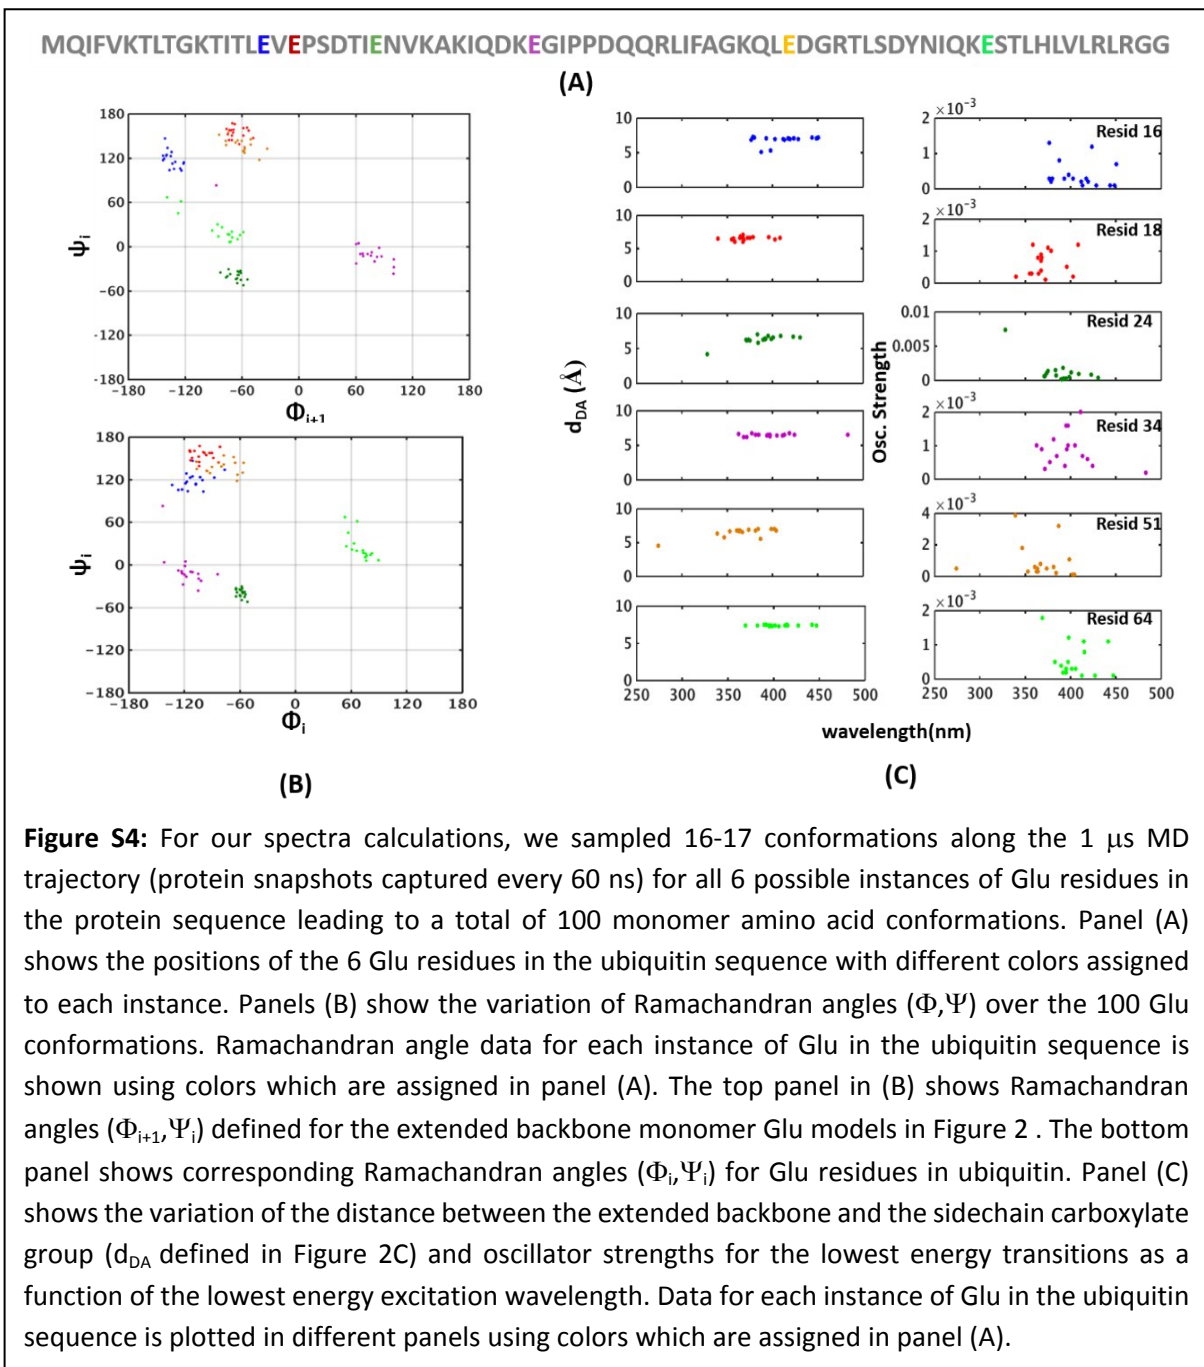

## Figure S5: Variation of geometric and spectral parameters over the sampled MD conformations of Asp

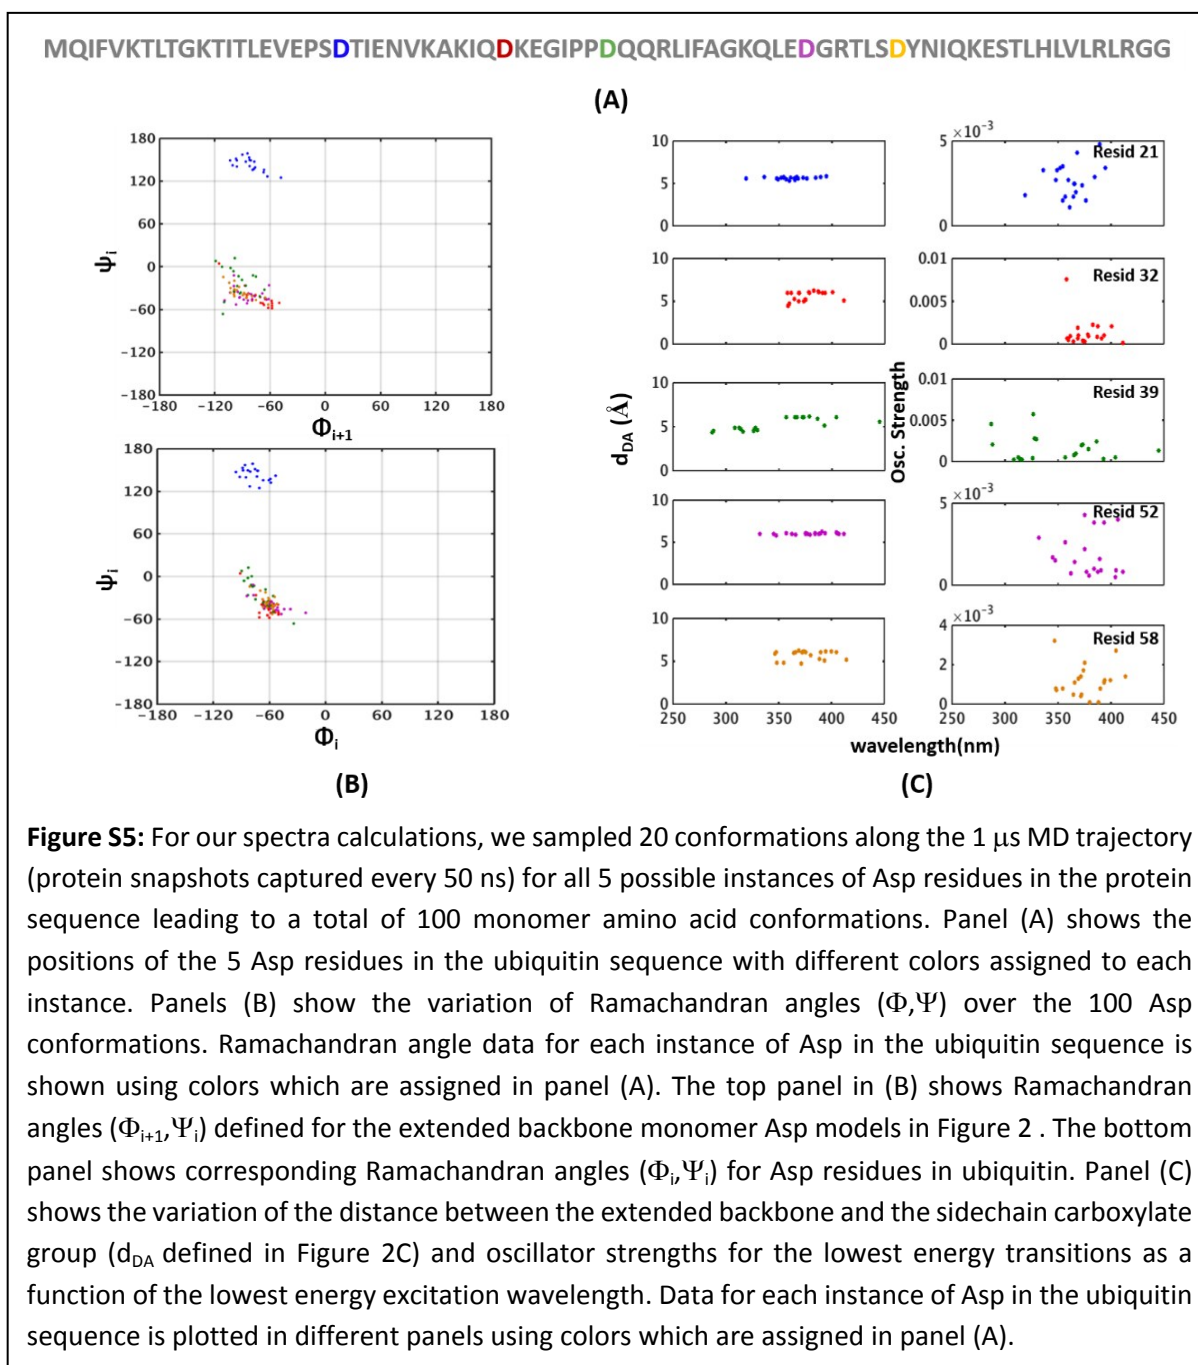

## Figure S6: Control calculations: Capping scheme used for TDDFT calculations of monomer units

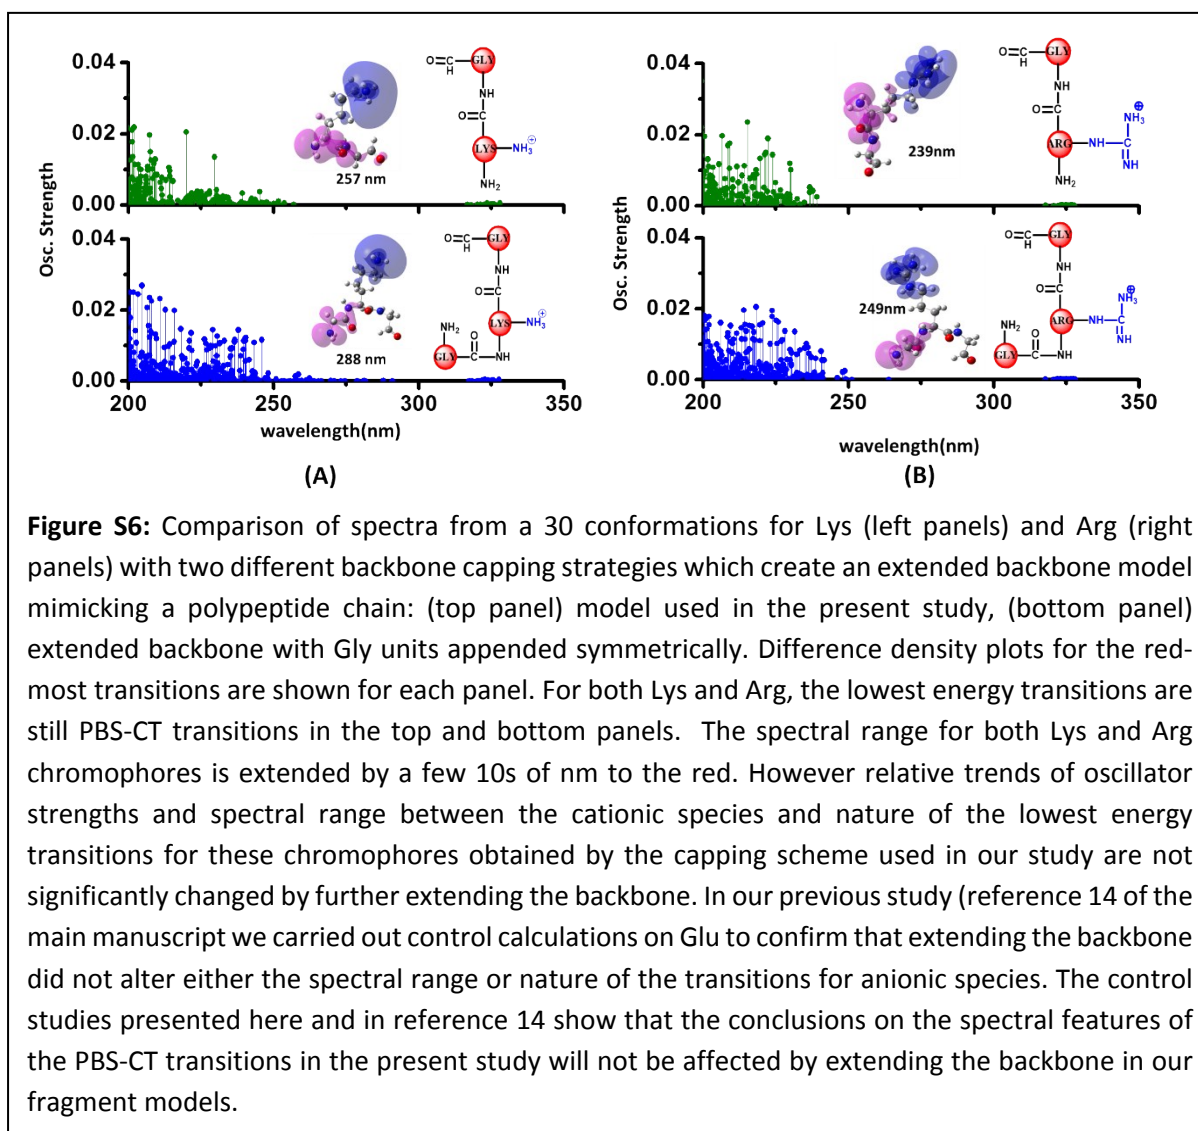



**Figure S7: Decomposition of Lowest Energy PBS-CT Transitions for Glu, Asp, pSer, pThr, and pTyr**

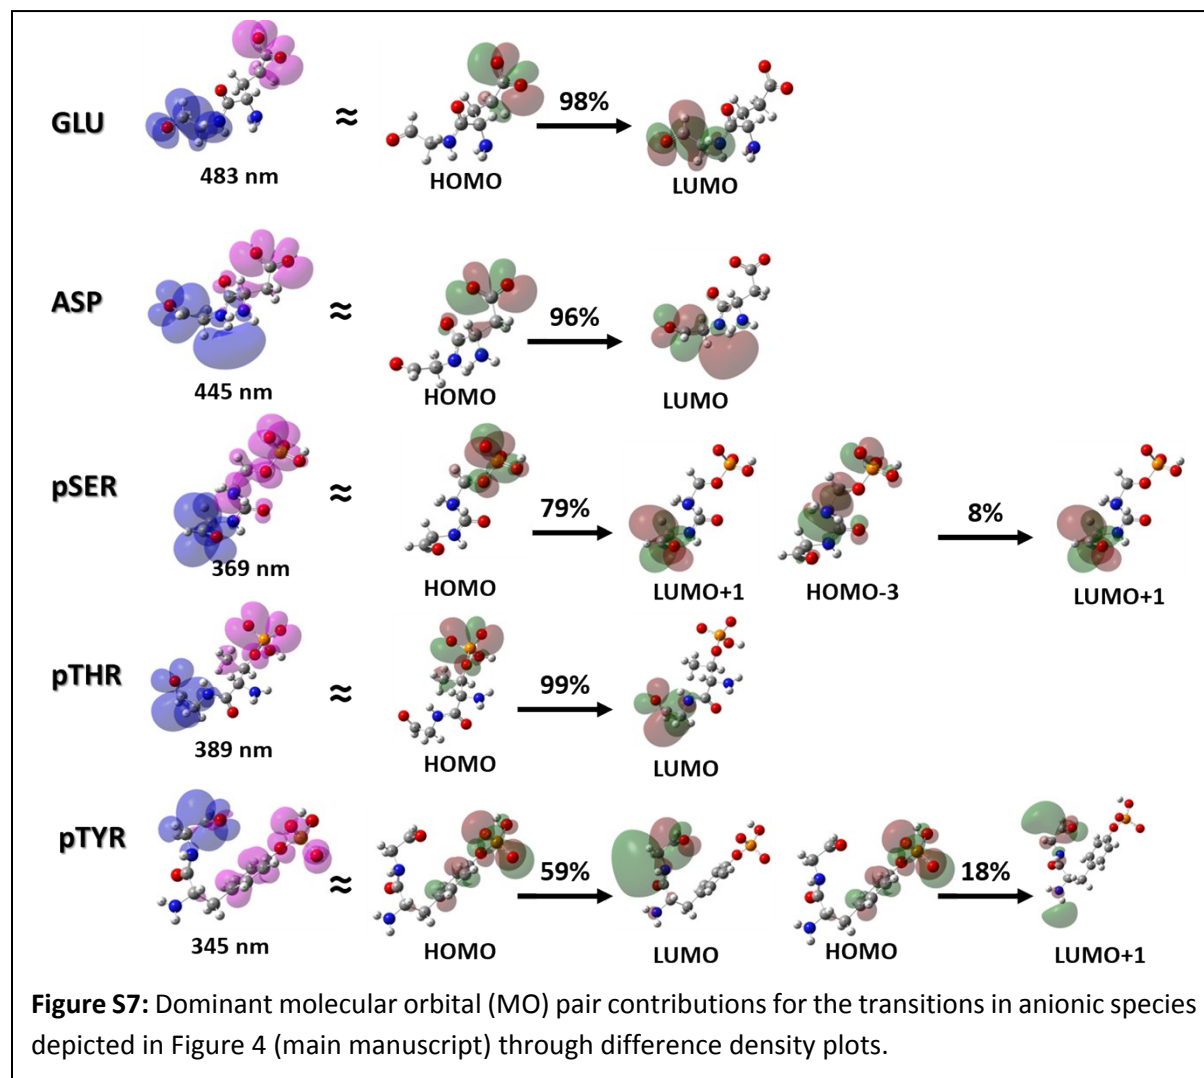

**Figure S8: Decomposition of Lowest Energy PBS-CT Transitions for Lys, Arg, Hsp, and His**

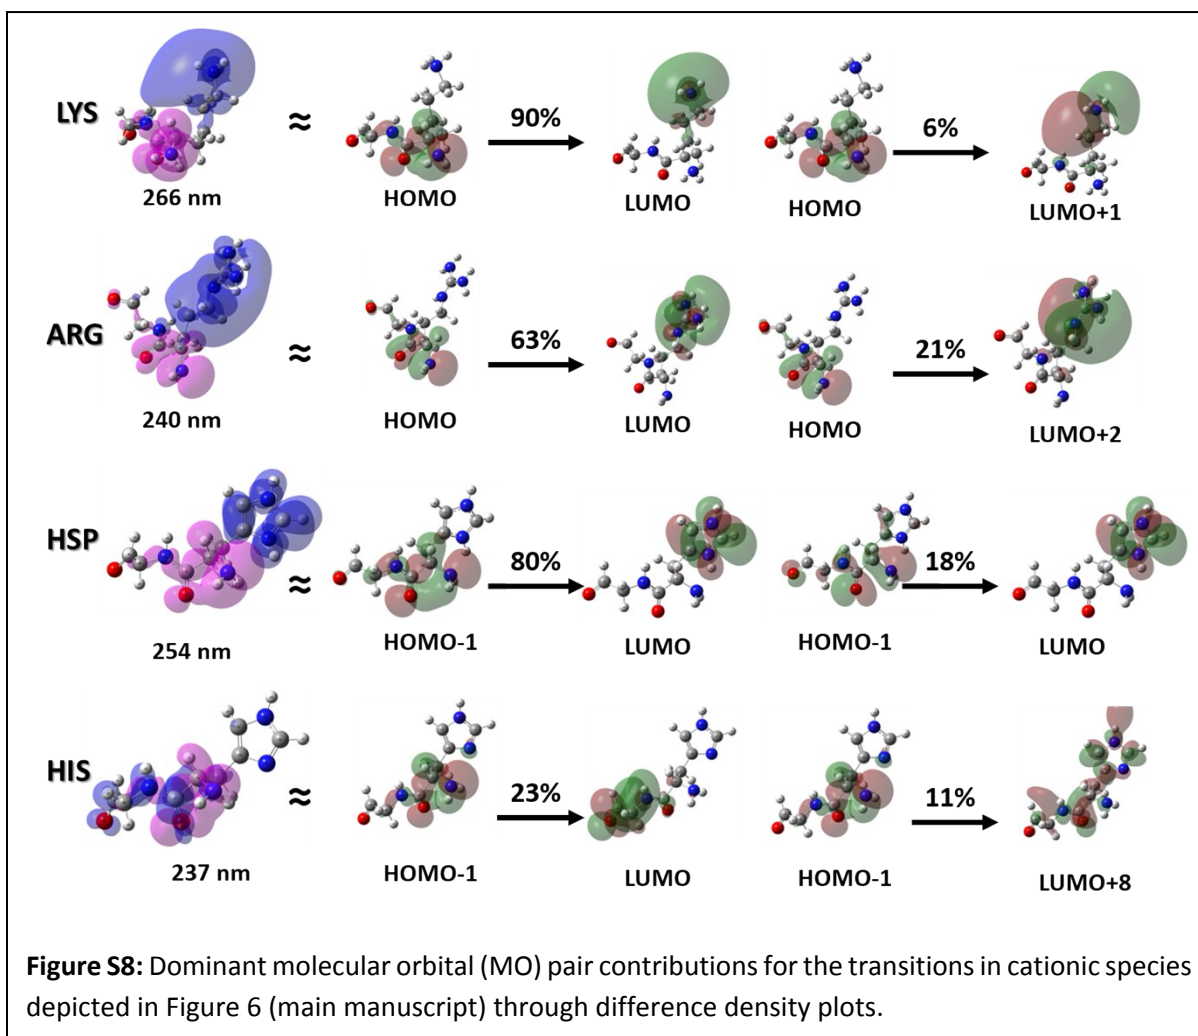

**Figure S9: Correlation of excitation wavelength of PBS-CT transitions in charged amino acids with ground state energy gap and  $1/D_{CT}$**

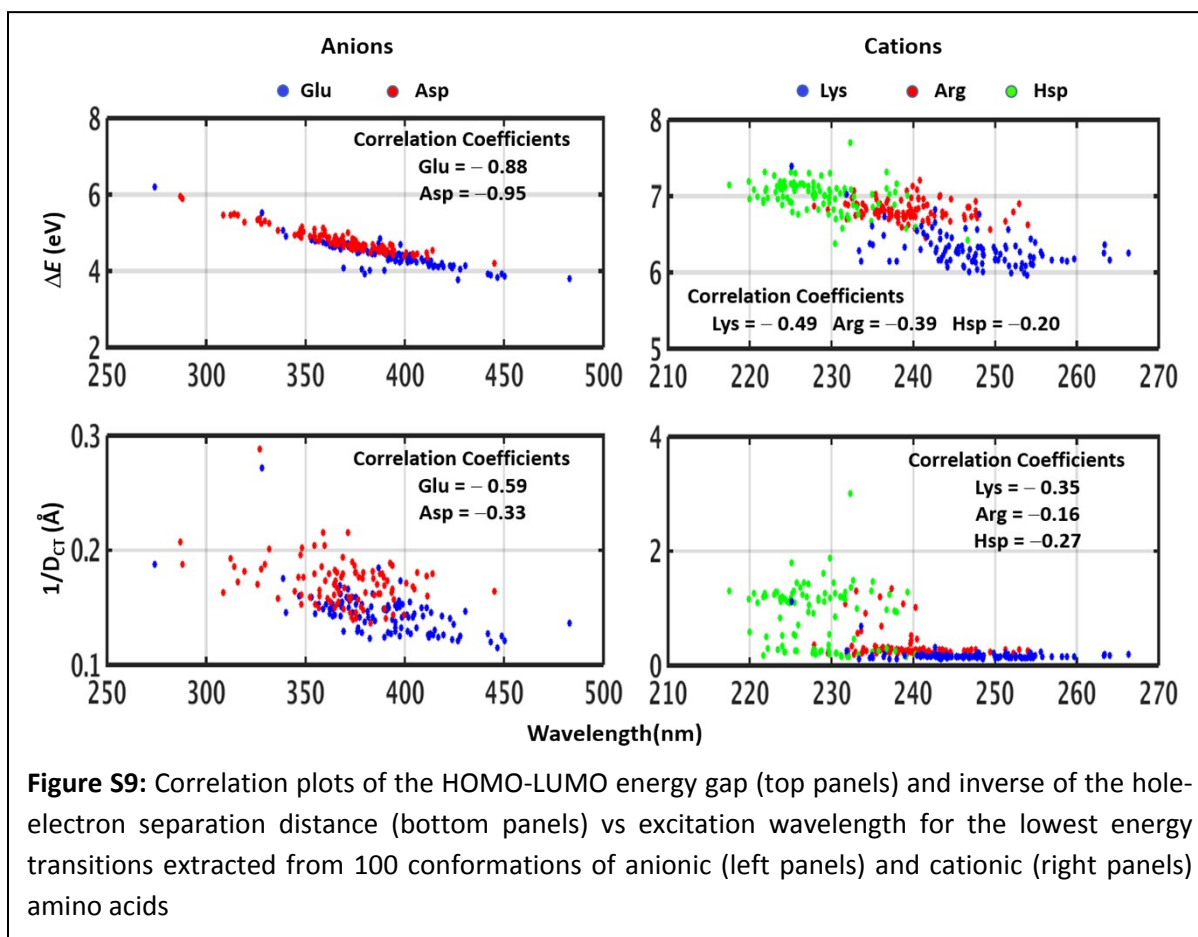

Supplement: c7fd00203c1.pdf [file c7fd00203c1.pdf]
